# Supplementary material for: Performance of two Ips bark beetles and their associated pathogenic fungi on hosts reflects a species-specific association in the beetle-fungus complex
Source: Front Plant Sci. 2022 Nov 22;13:1029526. doi: 10.3389/fpls.2022.1029526 (PMC9722963; doi:10.3389/fpls.2022.1029526)
Supplement: Supplementary file 1 [file Table_1.xlsx]

## Sheet: Sheet1
		Table S1 Independent sample T-test between developmental indices of two bark beetles on Picea jezoensis
		Developmental indices on P. jezoensis	I. typographus	I. sublongatus	P value
			Mean ± SE	M ean ± SE
		Fecundity (egg number)	35.37 ± 3.01	18.49 ± 2.17	<0.01
		egg hatchability (%)	92.21 ± 1.27	97.46 ± 1.26	0.017
		Ovipositional gallery length (cm)	6.78 ± 0.57	4.78 ± 0.37	0.012
		Larval gallery length (cm)	4.91 ± 0.42	3.23 ± 0.25	0.01
		Larval head capsule width (cm)	0.09 ± 0.00	0.06 ± 0.00	0.018
		Brood adult weight (g)	0.01 ± 0.00	0.01 ± 0.00	0.01
