# Supplementary material for: Performance of two Ips bark beetles and their associated pathogenic fungi on hosts reflects a species-specific association in the beetle-fungus complex
Source: Front Plant Sci. 2022 Nov 22;13:1029526. doi: 10.3389/fpls.2022.1029526 (PMC9722963; doi:10.3389/fpls.2022.1029526)
Supplement: Supplementary file 2 [file Table_2.xlsx]

## Sheet: Sheet1
	Table S2	Significance analysis of lesion area and ergosterol between three culture inoculation treatments on the same tree.
	Culture inoculation	Lesion area (cm2 ± SE)			Absolute amount of ergosterol (μg ± SE)			Relative amount of ergosterol(μg/cm2 ± SE)
		P. jezoensis	L. olgensis		P. jezoensis	L. olgensis		P. jezoensis	L. olgensis
	E. fujiensis	1.57±0.12 b	2.08±0.14 a		30.04±8.58 b	148.10±48.69 a		13.55±3.59 a	65.24±19.96 a
	E. polonica	5.80±0.30 a	0.79±0.04 b		113.10±25.29 a	10.63±2.78 b		21.25±3.79a	10.96±2.99 b
	CK-MEA	0.83±0.04 c	0.82±0.04 b		9.64±3.24 b	9.05±0.09 b		7.87±0.62 b	10.51±0.84 b
	Note: Means followed by different letters in the same column are significantly different (P < 0.05).
