# Supplementary material for: Performance of two Ips bark beetles and their associated pathogenic fungi on hosts reflects a species-specific association in the beetle-fungus complex
Source: Front Plant Sci. 2022 Nov 22;13:1029526. doi: 10.3389/fpls.2022.1029526 (PMC9722963; doi:10.3389/fpls.2022.1029526)
Supplement: Supplementary file 3 [file Table_3.xlsx]

## Sheet: Sheet1
		Table S3	Significance analysis of monoterpene release of six monoterpene components within each inoculation treatment on the same tree.
		Table S3-1
		P. jezoensis	1 dpi (μg /h ± SE)					91 dpi (μg /h ± SE)
			E. fujiensis	E. polonica	CK-MEA	CK-healthy		E. fujiensis	E. polonica	CK-MEA	CK-healthy
		α-pinene	4.58±1.03 a	3.62±0.51 a	2.51±0.95 a	2.00±0.37 a		84.93±9.16 a	14.04±1.53 a	3.37±0.31 a	2.37±0.48 a
		β-pinene	1.57±0.28 b	1.69±0.33 b	1.93±0.41 ab	1.82±0.25 a		56.66±7.28 b	9.06±1.16 b	2.00±0.62 b	1.87±0.33 a
		myrcene	0.35±0.05 b	0.23±0.01 c	0.23±0.03 b	0.29±0.05 b		1.82±0.19 c	0.42±0.07 c	0.27±0.08 c	0.27±0.06 b
		3-carene	0.17±0.02 b	0.26±0.05 c	1.67±0.05 b	0.16±0.02 b		1.52±0.21 c	0.51±0.04 c	0.24±0.06 c	0.24±0.06 b
		limonene	0.19±0.02 b	0.23±0.06 c	0.19±0.02 b	0.17±0.04 b		0.70±0.16 c	0.61±0.09 c	0.20±0.06 c	0.19±0.04 b
		camphene	0.15±0.04 b	0.18±0.01 c	0.14±0.02 b	0.15±0.04 b		1.23±0.33 c	0.79±0.13 c	0.25±0.02 c	0.21±0.06 b
		Table S3-2
		L. olgensis	1 dpi (μg /h ± SE)					91 dpi (μg /h ± SE)
			E. fujiensis	E. polonica	CK-MEA	CK-healthy		E. fujiensis	E. polonica	CK-MEA	CK-healthy
		α-pinene	1.38±0.51 a	1.60±0.47 a	1.27±0.19 ab	1.14±0.25 ab		12.97±2.50 b	5.35±0.54 a	1.73±0.10 b	1.64±0.32 a
		β-pinene	1.09±0.14 ab	0.75±0.28 bc	0.67±0.18 b	0.97±0.21 b		6.16±0.91 c	1.35±0.37 ab	2.54±0.37 a	1.33±0.12 abc
		myrcene	0.22±0.02 bc	0.16±0.01 c	0.20±0.03 bc	0.17±0.01 c		0.85±0.26 cd	0.41±0.06 b	0.30±0.07 c	0.22±0.05 bc
		3-carene	0.90±0.09 ab	0.67±0.08 b	1.35±0.24 a	1.29±0.19 a		19.53±1.88 a	2.21±0.32 ab	0.71±0.06 c	1.51±0.55 ab
		limonene	0.09±0.01 c	0.21±0.07 c	0.20±0.02 bc	0.13±0.02 c		0.48±0.08 d	0.19±0.03 b	0.22±0.06 c	0.19±0.02 bc
		terpinolene	0.09±0.03 c	0.09±0.03 c	0.14±0.03 bc	0.16±0.04 c		1.60±0.25 d	0.66±0.13 b	0.18±0.01 c	0.21±0.02 bc
		Note: Means followed by different letters in the same column within the same sampling date are significantly different (P < 0.05).
